# Supplementary material for: Iron pyrophosphate doped carbon nanocomposite for tetracycline degradation by activation of peroxymonosulfate
Source: Royal Society of Chemistry journal article supplement (doi:10.1039/d2nj03259g), 2022-01-01
Supplement: d2nj03259g1.pdf [file d2nj03259g1.pdf]

## Iron pyrophosphate doped carbon nanocomposite for tetracycline degradation by activation of peroxymonosulfate

Qian Ma,<sup>a</sup> Yu Sun,<sup>a</sup> Chuning Zhang,<sup>a</sup> Yinghao Xue,<sup>a</sup> Yanyan Chen,<sup>a</sup> Wei Teng<sup>a</sup> and Jianwei Fan<sup>\*a</sup>

<sup>a</sup> State Key Laboratory of Pollution Control and Resources Reuse, College of Environmental Science and Engineering, Tongji University, Shanghai, 200092, P. R. China

\* Corresponding Author

E-mail address: fanjianwei@tongji.edu.cn (J. Fan)

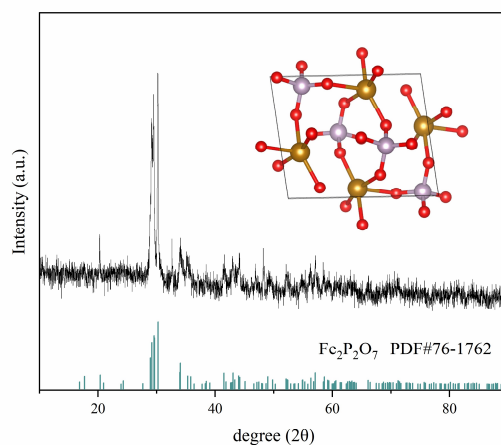

Fig.S1 XRD pattern of Fe<sub>2</sub>P<sub>2</sub>O<sub>7</sub>@C.

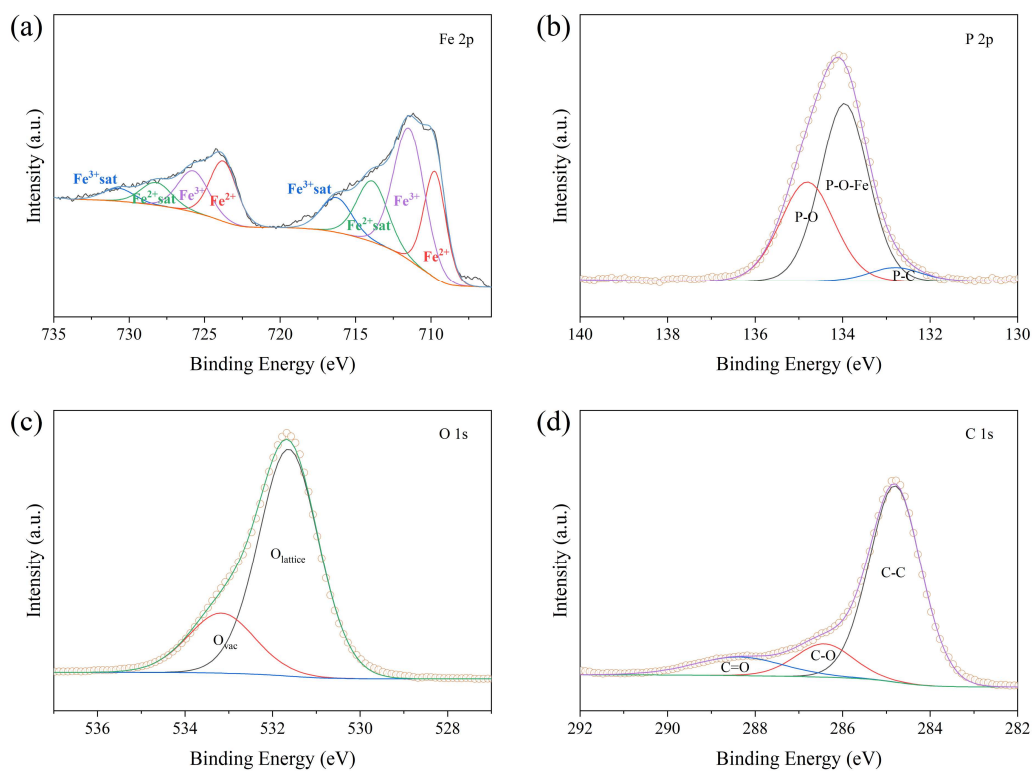

**Fig.S2** The high-resolution (a) Fe 2p, (b) P 2p, (c) O 1s, and (d) C 1s XPS spectra of used Fe<sub>2</sub>P<sub>2</sub>O<sub>7</sub>@C.

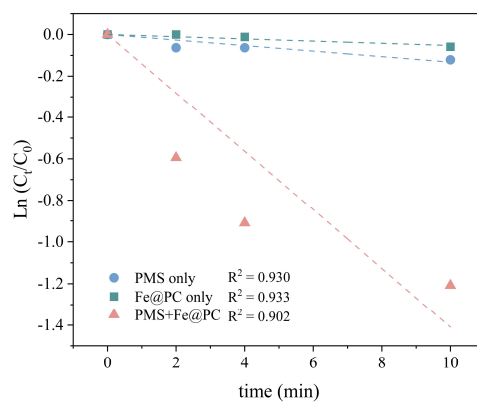

**Fig.S3** Relative linear fit of the pseudo-first-order kinetic model. Reaction condition: [TC] = 30 mg L<sup>-1</sup>, [Fe<sub>2</sub>P<sub>2</sub>O<sub>7</sub>@C] = 0.2 g L<sup>-1</sup>, [PMS] = 2 mM, and pH = 6.
